# Supplementary material
Source: PubMed Central journal article supplement (PMC3990173)
Supplement: supp_ddt669_ddt669supp.pdf [file supp_ddt669_ddt669supp.pdf]

## SUPPLEMENTARY MATERIAL

**Disruption of the *ASTN2* / *TRIM32* locus at 9q33.1 is a risk factor in males for Autism Spectrum Disorders, ADHD and other neurodevelopmental phenotypes.**

| Supplementary Material                                                                            | Page                 |
|---------------------------------------------------------------------------------------------------|----------------------|
| Figure S1. Exonic CNVs reported at the <i>ASTN2/TRIM32</i> locus by previous studies              | 2-3                  |
| Figure S2. Exonic gains at the <i>ASTN2/TRIM32</i> locus in clinical and control cohorts.         | 4                    |
| Figure S3. Functional impact of <i>ASTN2</i> deletions on gene expression in lymphoblasts         | 5                    |
| Figure S4. Conservation analysis of untranslated regions (UTRs) of <i>ASTN2</i> and <i>TRIM32</i> | 6                    |
| Figure S5. Amino acid alignment and protein conservation analysis of <i>ASTN2</i> .               | 7-9                  |
| Figure S6. Quantification of residue conservation profile of <i>ASTN2</i> (ENSP00000354504)       | 10                   |
| Figure S7. Functional enrichment maps of genes co-expressed with <i>ASTN2</i>                     | 11                   |
| Figure S8. Expression profile of <i>TRIM32</i> across human brain development                     | 12                   |
| Figure S9. Comparisons of probe distributions of the microarray platforms used in this study      | 13                   |
| Table S1. Detailed clinical information from individuals with rare CNVs of interest               | See excel attachment |
| Table S2. Control cohorts examined for CNVs at <i>ASTN2/TRIM32</i> and <i>ASTN1</i>               | 14-15                |
| Table S3: Coordinates of CNVs at <i>ASTN2/TRIM32</i> and <i>ASTN1</i> in control individuals      | 16                   |
| Table S4: <i>ASTN1</i> missense sequence variants in 338 Canadian ASD cases                       | 17                   |
| Table S5. Rare <i>ASTN2</i> missense sequence variants in 182 Canadian ASD cases                  | 18                   |
| Table S6. Rare <i>TRIM32</i> missense sequence variants in 182 Canadian ASD cases                 | 19                   |
| Table S7. Lists of genes co-expressed with <i>ASTN2</i> and Gene Ontology (GO) analyses results   | See excel attachment |
| Table S8. Cases from the DECIPHER database with exonic <i>ASTN2</i> CNVs                          | 20                   |
| Table S9. Microarray probe coverage at <i>ASTN2/TRIM32</i> and <i>ASTN1</i>                       | 21                   |
| Table S10. RT-PCR and qRT-PCR primer sets used for <i>ASTN2</i> expression analysis               | 22                   |
| Supplementary References                                                                          | 23-24                |

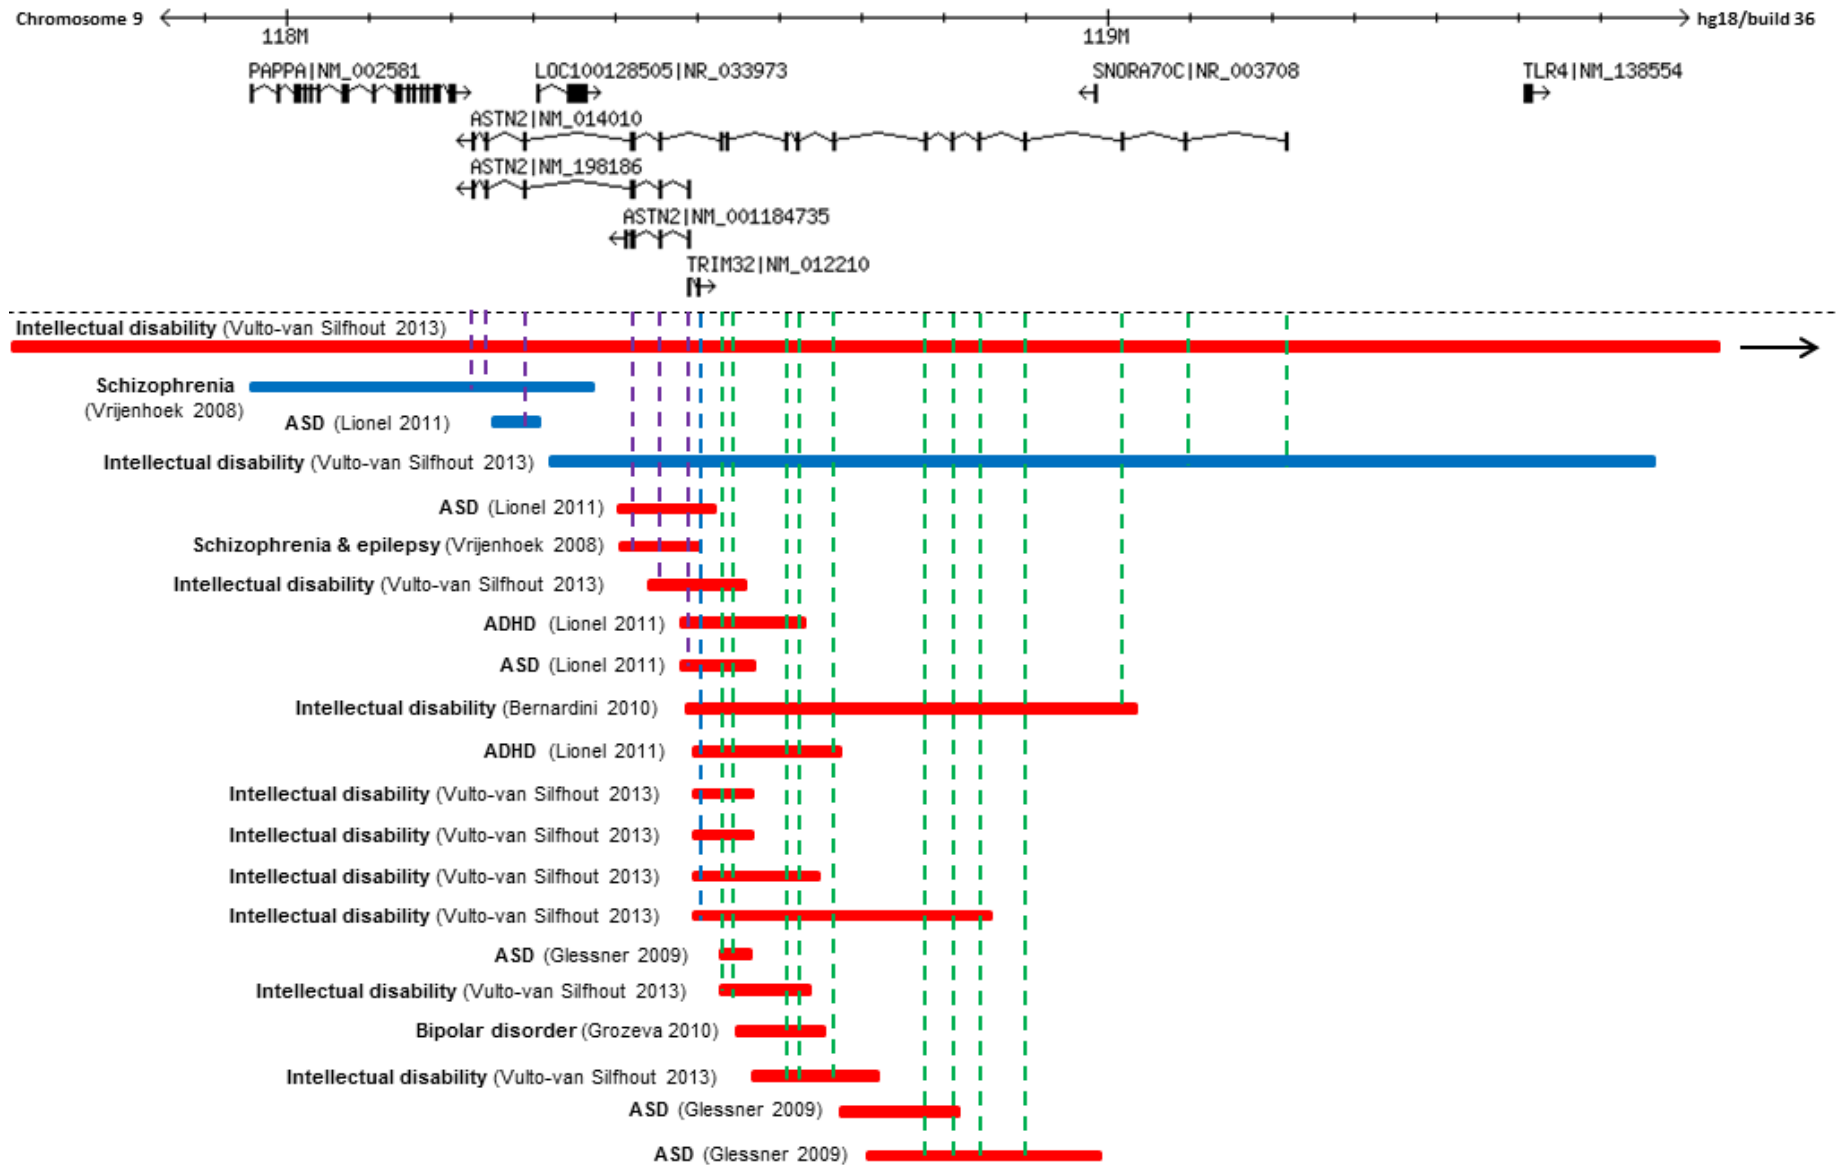

**Figure S1. Exonic CNVs reported at the *ASTN2/TRIM32* locus by previous studies.**

Blue and red bars represent duplications and deletions respectively. Dashed purple lines intersect CNVs that overlap exons shared by multiple *ASTN2* isoforms and green lines intersect those affecting only the long isoform. Dashed vertical blue line intersects CNVs that overlap an exon of *TRIM32*. Genomic locations and coordinates are based on hg18 (NCBI36). Information about genes and transcript isoforms was obtained from the RefSeq database. The three transcript isoforms of *ASTN2* possessing different number of exons are depicted including the long isoform (NM\_014010) and two shorter isoforms (NM\_198186 and NM\_001184735). The three other shorter isoforms of the gene (NM\_198187, NM\_198188 and NM\_001184734) have the same number and location of exons as NM\_198186 but differ slightly in the length of their first and terminal exons and UTRs. CNVs presented in this figure are from the following genome-wide microarray scans of different neurodevelopmental disorders: Vrijenhoek *et al.*,<sup>(1)</sup> Lionel *et al.*,<sup>(2)</sup> Bernardini *et al.*,<sup>(3)</sup> Glessner *et al.*,<sup>(4)</sup> Grozeva *et al.*,<sup>(5)</sup> and Vulto-van Silfhout *et al.*,<sup>(6)</sup> Coordinates were not specified by Fernandez *et al.*,<sup>(7)</sup> for the exonic deletions reported in two individuals with Tourette syndrome. The five exonic CNVs from Lionel *et al.* are included, together with more clinical information, in this study as patients 14, 21, 22, 26 and 48. The significant enrichments of exonic deletions affecting multiple *ASTN2* isoforms in NDD cases vs. controls ( $p = 0.009$ ) and in male NDD cases vs. male controls ( $p = 0.015$ ) are still observed if these cases are removed from the CNV analyses.

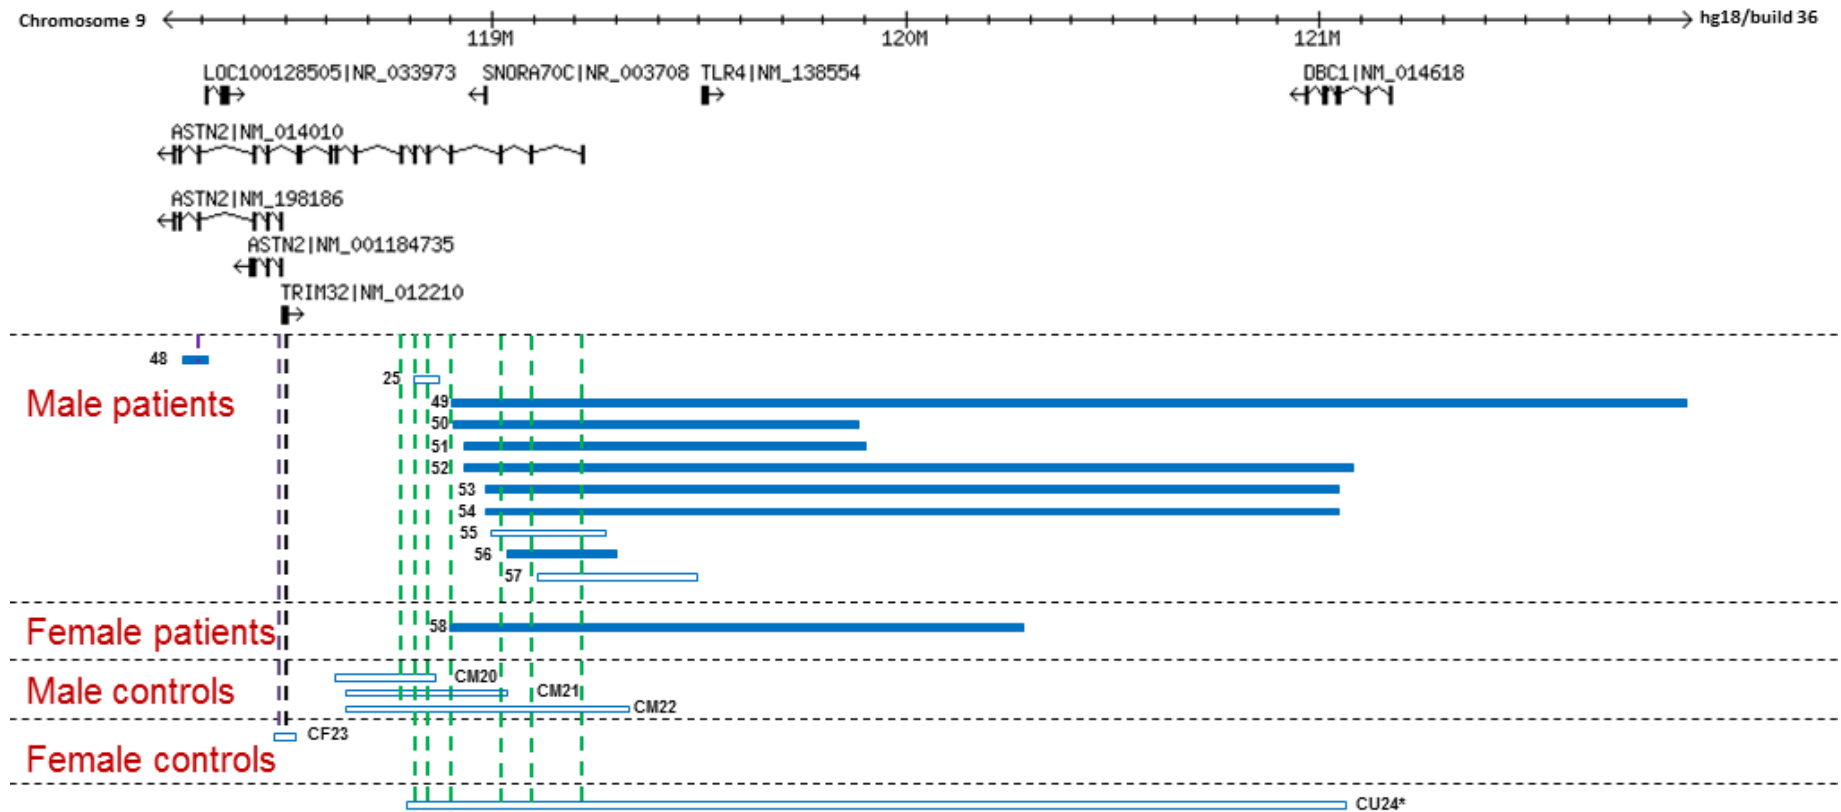

**Figure S2. Exonic gains at the *ASTN2/TRIM32* locus in clinical and control cohorts.**

Exonic duplications identified in 12 / 89,985 cases and 5 / 44,085 controls are depicted. All described duplication CNVs in the cases, except for the one in male patient 48, involve only the 5' portion of the longest isoform of *ASTN2*. These duplications were not found to be significantly enriched in cases vs. controls and their etiological contribution is unclear. Filled blue bars represent duplications detected in individuals with NDD phenotypes. Empty blue bars denote duplications in cases without known NDD traits from available clinical information and in controls. Numbers adjacent to the bars are the randomized sample ids of individuals with the duplications and correlate with information in Table 2, Table S1 and Table S3. Gender information was not available for the control individual (CU24) marked with \* at the bottom of the figure. Dashed purple lines intersect duplications that overlap exons shared by multiple *ASTN2* isoforms and green lines intersect duplications affecting only the long isoform. Dashed vertical black line intersects duplications that overlap an exon of *TRIM32*. Genomic locations and coordinates are based on hg18 (NCBI36). Information about genes and transcript isoforms was obtained from the RefSeq database.

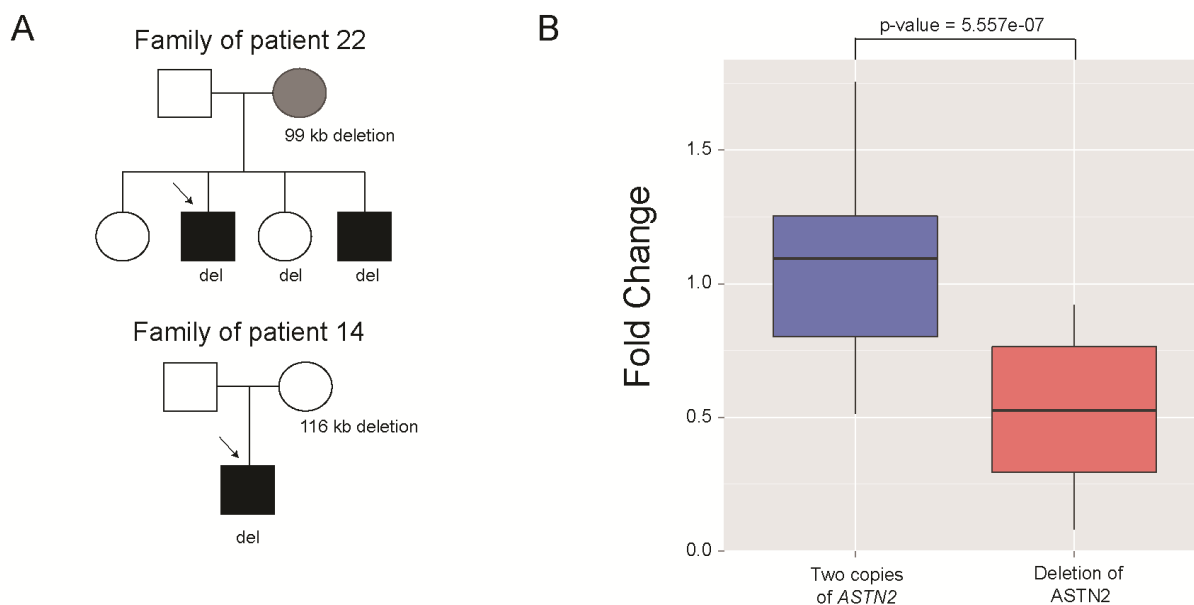

**Figure S3. Functional impact of *ASTN2* deletions on gene expression in lymphoblasts.**

A) Pedigrees of the two families used for *ASTN2* expression analysis. Arrows indicate the index probands of the pedigrees (denoted as patients 14 and 22 in this study). Individuals with black shading have an ASD diagnosis while the person represented by gray shading reported depression and anxiety issues. B) Relative *ASTN2* expression in lymphoblast cell lines from the six individuals (3 males and 3 females) with *ASTN2* deletions in the two pedigrees were compared to lymphoblast cell-lines from 9 individuals (5 males and 4 females) with two copies of *ASTN2*. The latter group included the three individuals without deletions in the two pedigrees as well as six additional samples with two copies of *ASTN2*. The lymphoblast cell lines were cultured as previously described.<sup>(8)</sup> Total RNA was extracted using Qiagen RNeasy mini kit with DNase I treatment (QIAGEN, Valencia, CA, USA). cDNA synthesis and qRT-PCR were performed as described in the main Methods. The expression was measured using two different primer pairs which detected all *ASTN2* isoforms (Table S10). *ASTN2* expression was normalized using *GAPDH* (dCt) and the fold change was calculated using the  $\Delta\Delta C_t$  method. Student's T-test was used to assess the expression difference between the two sample groups for statistical significance.

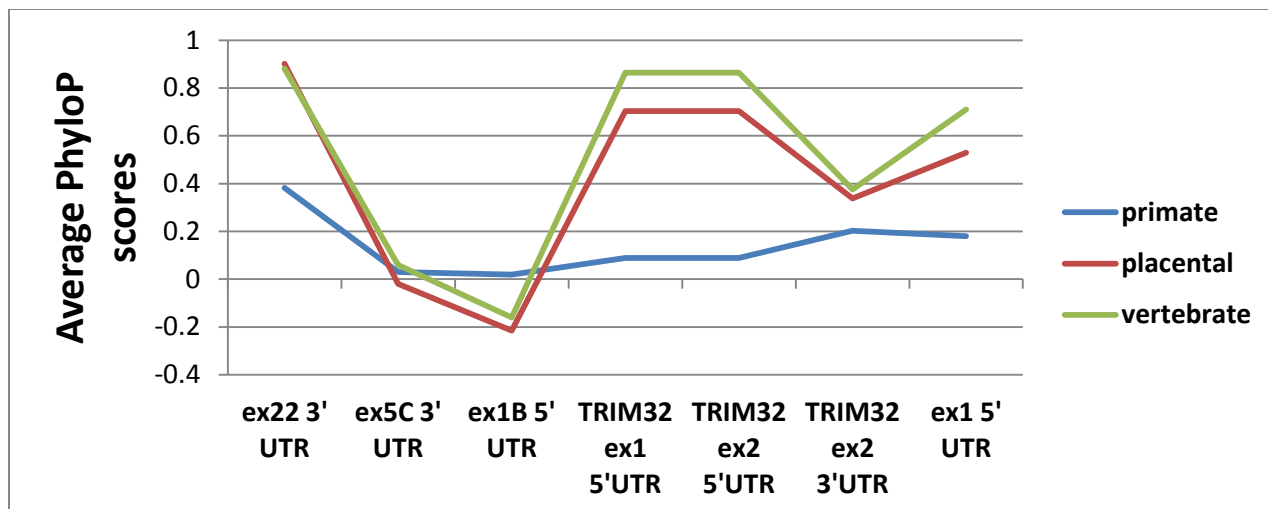

**Figure S4. Conservation analysis of untranslated regions (UTRs) of *ASTN2* and *TRIM32* exons.** The conservation was determined using average PhyloP scores calculated from nucleotide alignments between 46 vertebrate species including 23 placental mammals and eight primate species. Locations of the UTRs of different *ASTN2* transcript isoforms are labeled using the exon numbering in Figure 3A.

|                |                                                               |     |
|----------------|---------------------------------------------------------------|-----|
| H. sapiens     | MAAAGARLSPGPGSGLRGRPRLCFHGPPPLLP--LLLLFLLLLP-PPLLAGATAAAS-    | 56  |
| M. mulatta     | MAAAGARLSPGPGSGLRGRPRLCFHGPPPLLP--LLLLFLLLLP-PPLLAGATAAAS-    | 56  |
| P. troglodytes | LPTASEPISPGHSLRVQPRICFHGPPPLLP--LLLLFLLAKQPPPLLAGATAAAS-      | 57  |
| E. caballus    | -----                                                         |     |
| M. musculus    | MAAAGARRSPGRGLGRGRPRLCFHGPPPPPPPLLLLLFLLLLP-PPLLAGATAAAS      | 59  |
| C. familiaris  | -----                                                         |     |
| G. gallus      | -----                                                         |     |
| X. tropicalis  | -----                                                         |     |
|                |                                                               |     |
| H. sapiens     | REPDSPCRLKTVTVSTLPALRESDIGWSGARAGAGAGTGAG-----AAAAAASPGS      | 107 |
| M. mulatta     | REPDSPCRLKTVTVSTLPALRESDIGWSGARAGAGAGTGAG-----AAAAAS-PGS      | 106 |
| P. troglodytes | REPDSPCRLKTVTVSTLPALRESDIGWSGARAGAGAGTGAG-----AAAAAS-PGS      | 107 |
| E. caballus    | -----                                                         |     |
| M. musculus    | REPDSPCRLKTVTVSTLPALRESDIGWSGARTGAAAGAGAGTGAGAGAAAAAASAAASPGS | 119 |
| C. familiaris  | -----                                                         |     |
| G. gallus      | -----                                                         |     |
| X. tropicalis  | -----                                                         |     |
|                |                                                               |     |
| H. sapiens     | PGSAGTAAESRLLLLFVRNELPGRIVQDDLNTLPPFTLEMSGTAADISLVHWRQQWLE    | 167 |
| M. mulatta     | PGSAGTAAESRLLLLFVRNELPGRIVQDDLNTLPPFTLEMSGTAADISLVHWRQQWLE    | 166 |
| P. troglodytes | PGSAGTAAESRLLLLFVRNELPGRIVQDDLNTLPPFTLEMSGTAADISLVHWRQQWLE    | 167 |
| E. caballus    | -----EMSGTAADISLVHWRQQWLE                                     | 20  |
| M. musculus    | AGSAGTAAESRLLLLFVRNELPGRIVQDDLNTLPPFTLEMSGTAADISLVHWRQQWLE    | 179 |
| C. familiaris  | -----                                                         |     |
| G. gallus      | -----MSGTVADISLVHWRQQWLE                                      | 19  |
| X. tropicalis  | -----                                                         |     |
|                |                                                               |     |
| H. sapiens     | NGTLYFHVSMSSSSGQLAQATAPTLQEPSEIVEEQMHILHISVMGGLIALLLLLLVTVAL  | 227 |
| M. mulatta     | NGTLYFHVSMSSSSGQLAQATAPTLQEPSEIVEEQMHILHISVMGGLIALLLLLLVTVAL  | 226 |
| P. troglodytes | NGTLYFHVSMSSSSGQLAQATAPTLQEPSEIVEEQMHILHISVMGGLIALLLLLLVTVAL  | 227 |
| E. caballus    | NGTLYFHVSMSSSSGQLARATAPTLQEPSEIVEEQMHILHISVMGGLIALLLLLLVTVAL  | 80  |
| M. musculus    | NGTLYFHVSMSSSSGQLAQATAPTLQEPSEIVEEQMHILHISVMGGLIALLLLLLVTVAL  | 239 |
| C. familiaris  | -----MSSAGQLARATAPTLQEPSEIVEEQMHILHISVMGGLIALLLLLLVTVAL       | 51  |
| G. gallus      | NGTLYFHVSMSSAEQLSRATPPSLQEPSEIVEEQMHILHISVMGGLIALLLLLLVTVAL   | 79  |
| X. tropicalis  | -----                                                         |     |
|                |                                                               |     |
| H. sapiens     | YAQRWQKRRRIPQKSASTEATHEIHYIPSVLLGPQARESFRRSRLQTHNSVIGVPIRET   | 287 |
| M. mulatta     | YAQRWQKRRRIPQKSASTEATHEIHYIPSVLLGPQARESFRRSRLQTHNSVIGVPIRET   | 286 |
| P. troglodytes | YAQRWQKRRRIPQKSASTEATHEIHYIPSVLLGPQARESFRRSRLQTHNSVIGVPIRET   | 287 |
| E. caballus    | YAQRWQKRRRIPQKSASTEATHEIHYIPSVLLGPQARESFRRSRLQAHNSVIGVPIRET   | 140 |
| M. musculus    | YAQRWQKRRRIPQKSASTEATHEIHYIPSVLLGPQARESFRRSRLQTHNSVIGVPIRET   | 299 |
| C. familiaris  | YAQRWQKRRRIPQKSASTEATHEIHYIPSVLLGPQARESFRRSRLQAHNSVIGVPIRET   | 111 |
| G. gallus      | YAQRWQKRRRIPQKSASTEATHEIHYIPSVLLGPQARESFRRSRLQAHNSVIGVPIRET   | 139 |
| X. tropicalis  | -----                                                         |     |
|                |                                                               |     |
| H. sapiens     | PILDDYDCEEEDEPPRRANHVSREDEFGSQVTHLDSLGRPGEKVDFEKKA--- 338     |     |
| M. mulatta     | PILDDYDCEEEDEPPRRANHVSREDEFGSQVTHLDSLGRPGEKVDFEKKA---VTQ      | 344 |
| P. troglodytes | PILDDYDCEEEDEPPRRANHVSREDEFGSQVTHLDSLGRPGEKVDFEKKA---ATQ      | 345 |
| E. caballus    | PILDDYDCEEEDEPPRRANHVSREDEFGSQVTHLDSLGRPGEKVDFEKKA--- 191     |     |
| M. musculus    | PILDDYDCEEEDEPPRRANHVSREDEFGSQVTHLDSLGRPGEKVDFEKKA---ATQ      | 357 |
| C. familiaris  | PILDDYDCEDEDLPRRTNHVSREDEFGSQVTHLDSLGRPGEKVDFEKKA---ATQ       | 169 |
| G. gallus      | PILDDYDCEEEDETPQRAEPSTREDEFGSQVTRTLESLGRGEEKPDYEKKGVAPEVTQ    | 199 |
| X. tropicalis  | -----                                                         |     |
|                |                                                               |     |
| H. sapiens     | -----GGISFGRAKGTSGSE                                          | 353 |
| M. mulatta     | ETVESLMQKFKEFRANTPIEIGQLQPALRS-TSAGKRKRKRSRGGISFGRAKGTSGSE    | 403 |
| P. troglodytes | ETVESLMQKFKEFRANTPIEIGQLQPALRS-TSAGKRKRKRSRGGISFGRAKGTSGSE    | 404 |
| E. caballus    | -----GGISFGRTKGMSSGSE                                         | 206 |
| M. musculus    | ETVESLMQKFKEFRANTPIEIGQLQPASRSSTAGKRKRKRSRGGISFGRTKGTSGSE     | 417 |
| C. familiaris  | ETVESLMQKFKEFRANTPIEIGQLQPALRS-ASAGRRKRKRSRGGISFGRTKGTSGSE    | 228 |
| G. gallus      | ETVESLMQKFKEFRANTPIEIGQLQPALRS-TSVGRKRKRSRPRGGISFGRAKGTSGSE   | 258 |
| X. tropicalis  | -----                                                         |     |
|                |                                                               |     |
| H. sapiens     | ADDETQLTFYTEQYRSRRRSKGLLKSPVNKTALTLIAVSSCILAMVCGSQMSCPLTVKVT  | 413 |
| M. mulatta     | ADDETQLTFYTEQYRSRRRSKGLLKSPVNKTALTLIAVSSCILAMVCGSQMSCPLTVKVT  | 463 |
| P. troglodytes | ADDETQLTFYTEQYRSRRRSKGLLKSPVNKTALTLIAVSSCILAMVCGSQMSCPLTVKVT  | 464 |
| E. caballus    | ADDETQLTFYTEQYRSRRRSKGLLKSPVNKTALTLIAVSSCILAMVCGSQMSCPLTVKVT  | 266 |
| M. musculus    | ADDETQLTFYTEQYRSRRRSKGLLKSPVNKTALTLIAVSSCILAMVCGSQMSCPLTVKVT  | 477 |
| C. familiaris  | ADDETQLTFYTEQYRSRRRSKGLLKSPVNKTALTLIAVSSCILAMVCGSQMSCPLTVKVT  | 288 |
| G. gallus      | ADDETQLTFYTEQYRSRRRSKGLLKSPVNKTALTLIAVSSCILAMVCGSQMSCPLTVKVT  | 318 |
| X. tropicalis  | -----VVCGSQLSCPLTVKVT                                         | 16  |
|                | *****                                                         |     |

H. sapiens LHVPEHFIADGSSFFVSEGSYLDISDWLNPAKLSLYYQINATSPWVRDLGCGQRTTDAEQ 473  
M. mulatta LHVPEHFIADGSSFFVSEGSYLDISDWLNPAKLSLYYQINATSPWVRDLGCGQRTTDAEQ 523  
P. troglodytes LHVPEHFIADGSSFFVSEGSYLDISDWLNPAKLSLYYQINATSPWVRDLGCGQRTTDAEQ 524  
E. caballus LHVPEHFIADGSSFFVSEGSYLDISDWLNPAKLSLYYQINATSPWVRDLGCGQRTTDAEQ 326  
M. musculus LHVPEHFIADGSSFFVSEGSYLDISDWLNPAKLSLYYQINATSPWVRDLGCGQRTTDAEQ 537  
C. familiaris LHVPEHFIADGSSFFVSEGSYLDISDWLNPAKLSLYYQINATSPWVRDLGCGQRTTDAEQ 348  
G. gallus LHVPEHFIADGSSFFVSEGSYLDISDWLNPAKLSLYYQINATSPWVRDLGCGQRTTDAEQ 378  
X. tropicalis LHVPEHFIADGSSFFVSEGSYLDISDWLNPAKLSLYYQINATSPWVRDLGCGQRTTDAEQ 76  
\*\*\*\*\*:\*\*\*\*\*:\*\*\*\*\*:\*\*\*\*\*:\*\*\*\*\*:\*\*\*\*\*:\*\*\*\*\*:\*\*\*\*\*:\*\*\*\*\*:\*\*\*\*\*:\*\*\*\*\*

H. sapiens LCDPETGECSC--HEGYADPVHRHLCVRSDWGQSEGWPYTTTLERGYDLVTGEQAPEKI 531  
M. mulatta LCDPETGECSC--HEGYADPVHRHLCVRSDWGQSEGWPYTTTLERGYDLVTGEQAPEKI 581  
P. troglodytes LCDPETGECSC--HEGYADPVHRHLCVRSDWGQSEGWPYTTTLERGYDLVTGEQAPEKI 582  
E. caballus LCDPETGECSC--HEGYADPVHRHLCVRSDWGQSEGWPYTTTLERGYDLVTGEQAPEKI 384  
M. musculus LCDPDTGECSC--HEGYADPVHRHLCVRSDWGQSEGWPYTTTLERGYDLVTGEQAPEKI 595  
C. familiaris LCDPETGECSC--HEGYADPVHRHLCVRSDWGQSEGWPYTTTLERGYDLVTGEQAPEKI 406  
G. gallus LCDQETGQGTGWETDYPMPHRLCVRTDWGHSEGPWPYTTTLERGYDLVTGEQAPEKI 438  
X. tropicalis ICEPETGECSC--HEGYSPDATHRHLCVRSDWGQSQGPWPYTTTLERGYDLVTGEQAPEKI 134  
\*: \*\*: \* .\*\*\*\*.\*\*\*\*\*:\*\*\*\*\*:\*\*\*\*\*:\*\*\*\*\*:\*\*\*\*\*:\*\*\*\*\*:\*\*\*\*\*:\*\*\*\*\*

H. sapiens LRSTFSLGQGLWLPVSKSFVPPVELSINPLASCKTDVLTEDPADVR--EAMLSTYFET 590  
M. mulatta LRSTFSLGQGLWLPVSKSFVPPVELSINPLASCKTDVLTEDPADVR--EAMLSTYFET 640  
P. troglodytes L----SLGQGLWLPVSKSFVPPVELSINPLASCKTDVLTEDPADVR--EAMLSTYFET 637  
E. caballus LRSTFSLGQGLWLPVSKSFVPPVELSINPLASCKTDVLTEDPADVR--EAMLSTYFET 443  
M. musculus LRSTFSLGQGLWLPVSKSFVPPVELSINPLASCKTDVLTEDPADVR--EAMLSTYFET 654  
C. familiaris LRSTFSLGQGLWLPVSKSFVPPVELSINPLASCKTDVLTEDPADVR--EAMLSTYFET 465  
G. gallus LRSTYSLGQGLWLPVSKSFVPPVELSINPLASCKTDVLTEDPADVR--EAMLSTYFET 497  
X. tropicalis LRSTYSLGQGLWLPVSKSFVPPVELSINPLASCKTDVLTEDPADVR--EAMLSTYFET 194  
\* \*\*\*\*\*:\*\*\*\*\*:\*\*\*\*\*:\*\*\*\*\*:\*\*\*\*\*:\*\*\*\*\*:\*\*\*\*\*:\*\*\*\*\*:\*\*\*\*\*:\*\*\*\*\*:\*\*\*\*\*

H. sapiens INDLLSSF6PVRDCSRNNGGCTRNFKCVSDRQVDSSGCVCEPELKPMDGSGCYDHSKGI 650  
M. mulatta INDLLSSF6PVRDCSRNNGGCTRNFKCVSDRQVDSSGCVCEPELKPMDGSGCYDHSKGI 700  
P. troglodytes INDLLSSF6PVRDCSRNNGGCTRNFKCVSDRQVDSSGCVCEPELKPMDGSGCYDHSKGI 697  
E. caballus INDLLSSF6PVRDCSRNNGGCTRNFKCVSDRQVDSSGCVCEPELRPMKDGSGCYDHSKGI 503  
M. musculus INDLLSSF6PVRDCSRNNGGCTRNFKCVSDRQVDSSGCVCEPELKPMDGSGCYDHSKGI 714  
C. familiaris INDLLSSF6PVRDCSRNNGGCTRNFKCVSDRQVDSSGCVCEPELRPMKDGSGCYDHSKGI 525  
G. gallus INDLLSSF6PVRDCSRNNGGCTRNFKCVSDRQVDSTGCVCEPELRPMKDGSGCYDHSKGI 557  
X. tropicalis VDDLLSSF6PVRDCSLGNGGCSRNFKCVSERKIDSTGCVVPP--LFLIRAGAGHPWPVGGP 252  
:\*\*\*\*\*:\*\*\*\*\*:\*\*\*\*\*:\*\*\*\*\*:\*\*\*\*\*:\*\*\*\*\*:\*\*\*\*\*:\*\*\*\*\*:\*\*\*\*\*:\*\*\*\*\*

H. sapiens DCSDFGNGGCEQLCQLQTLPLPYDATSSTIFMFCGCVVEEYKLPDGGKSLMLSDVCEGPK 710  
M. mulatta DCSDFGNGGCEQLCQLQTLPLPYDATSSTIFMFCGCVVEEYKLPDGGKSLMLSDVCEGPK 760  
P. troglodytes DCSDFGNGGCEQLCQLQTLPLPYDATSSTIFMFCGCVVEEYKLPDGGKSLMLSDVCEGPK 757  
E. caballus DCSDFGNGGCEQLCQLQTLPLPYDATSSTIFMFCGCVVEEYKLPDGGKSLMLSDVCEGPK 563  
M. musculus DCSDFGNGGCEQLCQLQTLPLPYDTTSSSTIFMFCGCVVEEYKLPDGGKSLMLSDVCEGPK 774  
C. familiaris DCSDFGNGGCEQLCQLQTLPLPYDATSSTIFMFCGCVVEEYKLPDGGKSLMLSDVCEGPK 585  
G. gallus DCSDFGNGGCEQLCQLQTLPLPHDPSSSTIFMFCGCVVEEYKLPDGGKSLMLSDVCEGPK 617  
X. tropicalis TGTEGRGNAMSVLGC SQVPLPCYVTSL PVNMGCSVCEYR LADGRSLMLTDICEGSK 312  
:\*\*\* . . . \* .\*. : \* : \* \* \*\*\*\*\*:\*\*\*\*\*:\*\*\*\*\*:\*\*\*\*\*:\*\*\*\*\*:\*\*\*\*\*

H. sapiens CLKPD5KFNDFLGEMLHGYNNRTQHVNQGVQFQMTFRENNFIKDFPQLADGLLVIPLPV 770  
M. mulatta CLKPD5KFNDFLGEMLHGYNNRTQHVNQGVQFQMTFRENNFIKDFPQLADGLLVIPLPV 820  
P. troglodytes CLKPD5KFNDFLGEMLHGYNNRTQHVNQGVQFQMTFRENNFIKDFPQLADGLLVIPLPV 817  
E. caballus CLKPD5KFNDFLGEMLHGYNNRTQHVNQGVQFQMTFRENNFIKDFPQLADGLLVIPLPV 623  
M. musculus CLKPD5KFNDFLGEMLHGYNNRTQHVNQGVQFQMTFRENNFIKDFPQLADGLLVIPLPV 834  
C. familiaris CLKPD5KFNDFLGEMLHGYNNRTQHVNQGVQFQMTFRENNFIKDFPQLADGLLVIPLPV 645  
G. gallus CLKSDAKFNDFLGEMLHGYNNRSQHVNQGVQFQMTFRENNFIKDFPQLADGLLVIPLPV 677  
X. tropicalis CLRPEDRLNDLFLGEMLHGYDNKTKQVNOQGRVQFQMSFRENNFIKDFPQLADGLLVIPLPV 372  
\* . . : : \*\*\*\*\*:\*\*\*\*\*:\*\*\*\*\*:\*\*\*\*\*:\*\*\*\*\*:\*\*\*\*\*:\*\*\*\*\*:\*\*\*\*\*:\*\*\*\*\*:\*\*\*\*\*

H. sapiens EEQCRGVLSEPLPDLQLLTGDIRYDEAMGYPMVQQWRVRSNLYRVKLSITL SAGFTNVL 830  
M. mulatta EEQCRGVLSEPLPDLQLLTGDIRYDEAMGYPMVQQWRVRSNLYRVKLSITL SAGFTNVL 880  
P. troglodytes EEQCRGVLSEPLPDLQLLTGDIRYDEAMGYPMVQQWRVRSNLYRVKLSITL SAGFTNVL 877  
E. caballus EEQCRGVLSEPLPDLQLLTGDIRYDEAMGYPMVQQWRVRSNLYRVKLSITL SAGFTNVL 683  
M. musculus EEQCRGVLSEPLPDLQLLTGDIRYDEAMGYPMVQQWRVRSNLYRVKLSITL SAGFTNVL 894  
C. familiaris EEQCRGVLSEPLPDLQLLTGDIRYDEAMGYPMVQQWRVRSNLYRVKLSITL SAGFTNVL 705  
G. gallus EEQCRGVLSEPLPDLQLLTGDIRYDEAMGYPMVQHWVRSNLYRVKLSITL SAGFTNVL 737  
X. tropicalis EEQCRGVLSEPRPDLQLLTGDIRYDEAMGYPMVQQWRVRSNLYRVKLSITL SAGFTNVL 432  
\*\*\*\*\*:\*\*\*\*\*:\*\*\*\*\*:\*\*\*\*\*:\*\*\*\*\*:\*\*\*\*\*:\*\*\*\*\*:\*\*\*\*\*:\*\*\*\*\*:\*\*\*\*\*:\*\*\*\*\*

H. sapiens KILTKESSREELL SFIQHYGSHYIAEALYGSELTCIIHFPSKKVQQQLWLQYQKETTTEL 890  
M. mulatta KILTKESSREELL SFIQHYGSHYIAEALYGSELTCIIHFPSKKVQQQLWLQYQKETTTEL 940  
P. troglodytes KILTKESSREELL SFIQHYGSHYIAEALYGSELTCIIHFPSKKVQQQLWLQYQKETTTEL 937  
E. caballus KILTKESSREELL SFIQHYGSHYIAEALYGSELTCIIHFPSKKVQQQLWLQYQKETTTEL 743  
M. musculus KILTKESSREELL SFIQHYGSHYIAEALYGSELTCIIHFPSKKVQQQLWLQYQKETTTEL 954  
C. familiaris KILTKESSREELL SFIQHYGSHYIAEALYGSELTCIIHFPSKKVQQQLWLQYQKETTTEL 765  
G. gallus KILNKDSSREELL SFIQHYGSHYIAEALYGSEFSCIIHFPSKKVQQQLWLQYQKETTTEL 797  
X. tropicalis KILSPQSSRELLNLVHLHYGSHYISEALYGSELTCIIHFPSKKVQQQLWLQYQKETTTEL 492  
\*\*\*\*\*:\*\*\*\*\*:\*\*\*\*\*:\*\*\*\*\*:\*\*\*\*\*:\*\*\*\*\*:\*\*\*\*\*:\*\*\*\*\*:\*\*\*\*\*:\*\*\*\*\*:\*\*\*\*\*





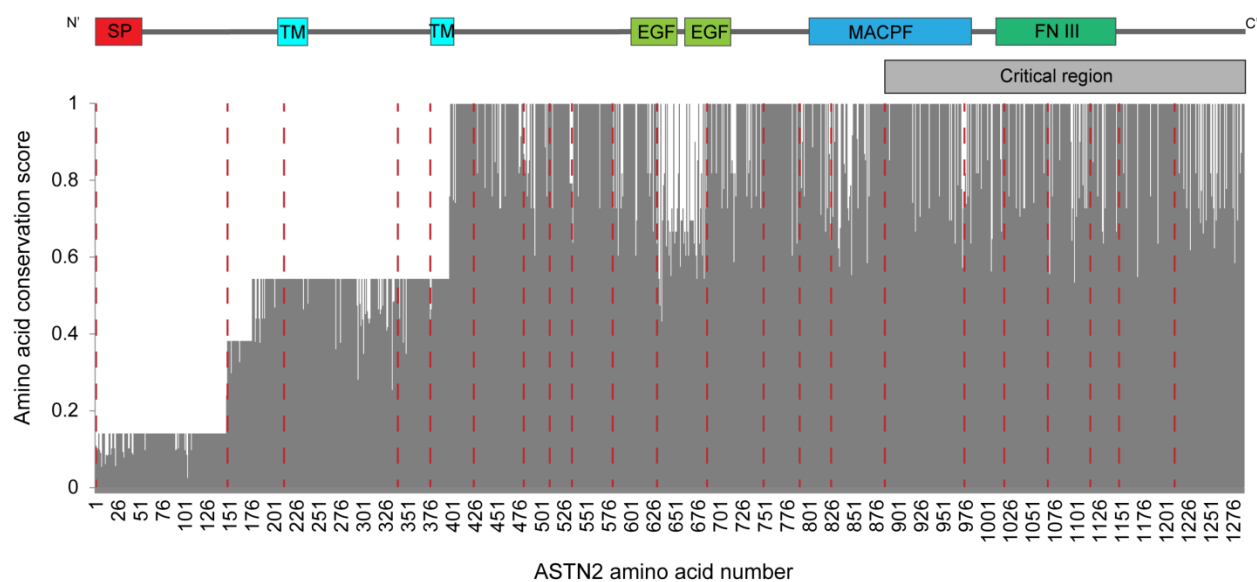

**Figure S6. Quantification of residue conservation profile of ASTN2 (ENSP00000354504).** Conservation score was calculated based on alignment in Figure S5 using the Scorecons server.(9) The known protein domains and features of ASTN2 are shown in the schematic illustration above the chart. The signal peptide (SP) is marked red, trans-membrane (TM) domains are marked light blue, EGF/laminin superfamily (EGF) domains are marked light green, the MACPF domain is marked blue and the fibronectin domain type 3 (FN III) is marked dark green. The critical region with enrichment of exonic deletions affecting multiple *ASTN2* isoforms in NDD cases from Figure 1 is shown in grey. Vertical red dashed lines correspond to the exon boundaries.

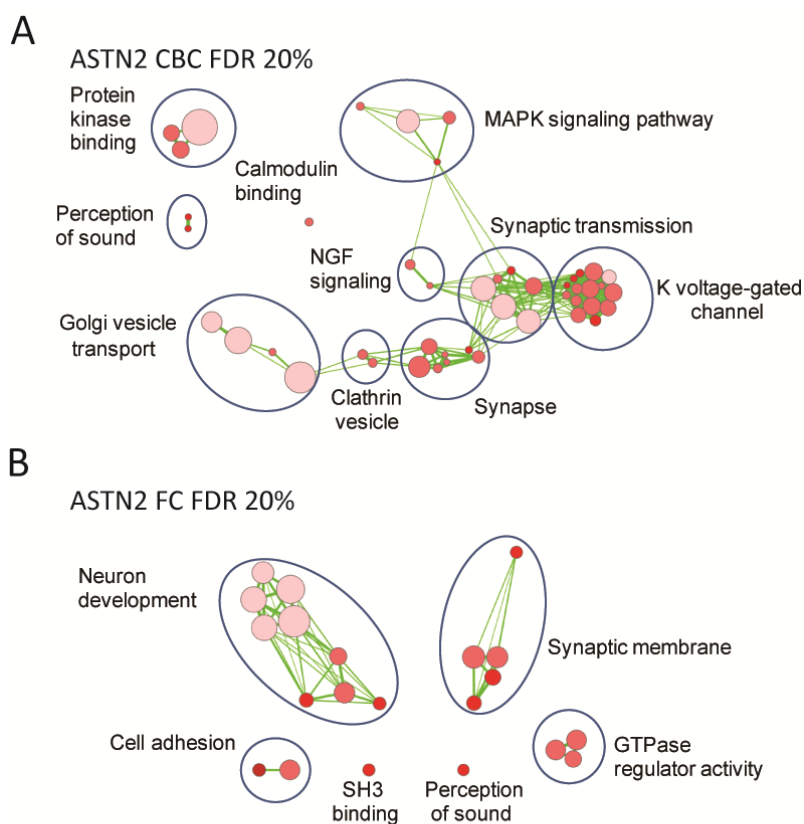

**Figure S7. Functional enrichment maps of genes co-expressed with *ASTN2*.** These maps depict the results of the gene set enrichment analysis of genes co-expressed with *ASTN2* in the frontal cortex (A) and the cerebellar cortex (B). Using the brain expression data from Brainspan,(10) the Pearson correlation coefficients were calculated between the expression levels of genes in the dataset and *ASTN2* in the CBC and FC regions. The top 500 most correlated genes for the two regions (Table S7) were used as inputs for the gene set enrichment analysis implementing manually curated gene ontology (GO) (org.Hs.eg.db, version 2.8.0) and pathways (downloaded from NCI, KEGG and Reactome websites) as previously described.(11, 12) Independently for the FC and the CBC, all expressed genes in each region were used as a background gene set and the statistical significance and false-discovery rate were calculated using the Fisher exact test and the Benjamini-Hochberg procedure respectively. The Cytoscape network software v.2.8.3 and the plugin Enrichment Map (version 1.2) were used to build the network. The functional enrichment maps were constructed using a false discovery rate cutoff of 20% and the gene-set clusters were manually identified and annotated (blue ovals) The node size is proportional to the gene-set size and the color corresponds to the odds ratio of enrichment (found in Table S7).

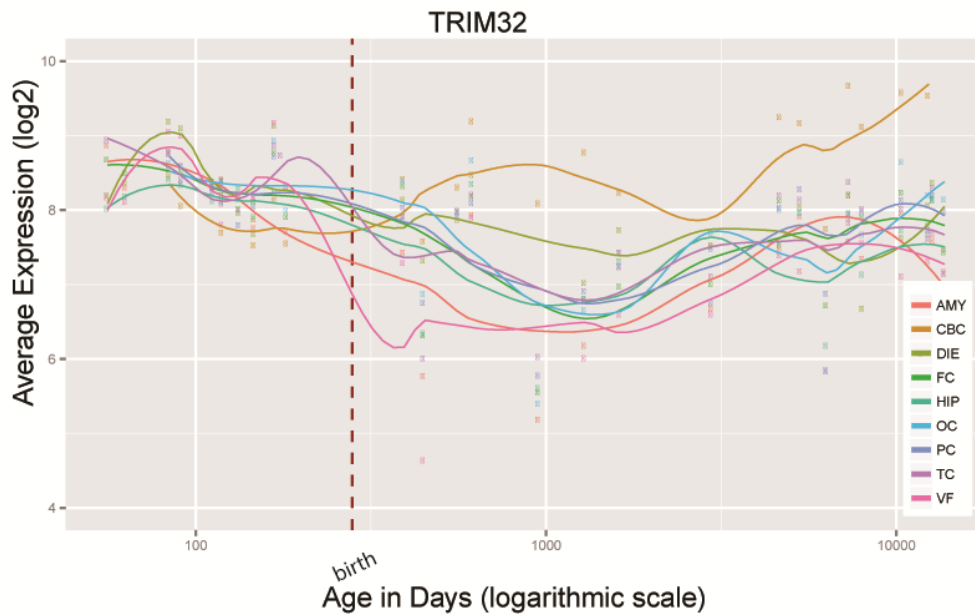

**Figure S8. Expression profile of *TRIM32* across human brain development.** The normalized expression data from the Brainspan database of *TRIM32* in amygdala (AMY), cerebellar cortex (CBC), diencephalon (DIE), frontal cortex (FC), hippocampus (HIP), occipital cortex (OC), parietal cortex (PC), temporal cortex (TC) and ventral forebrain (VF) was plotted across different developmental time-points.

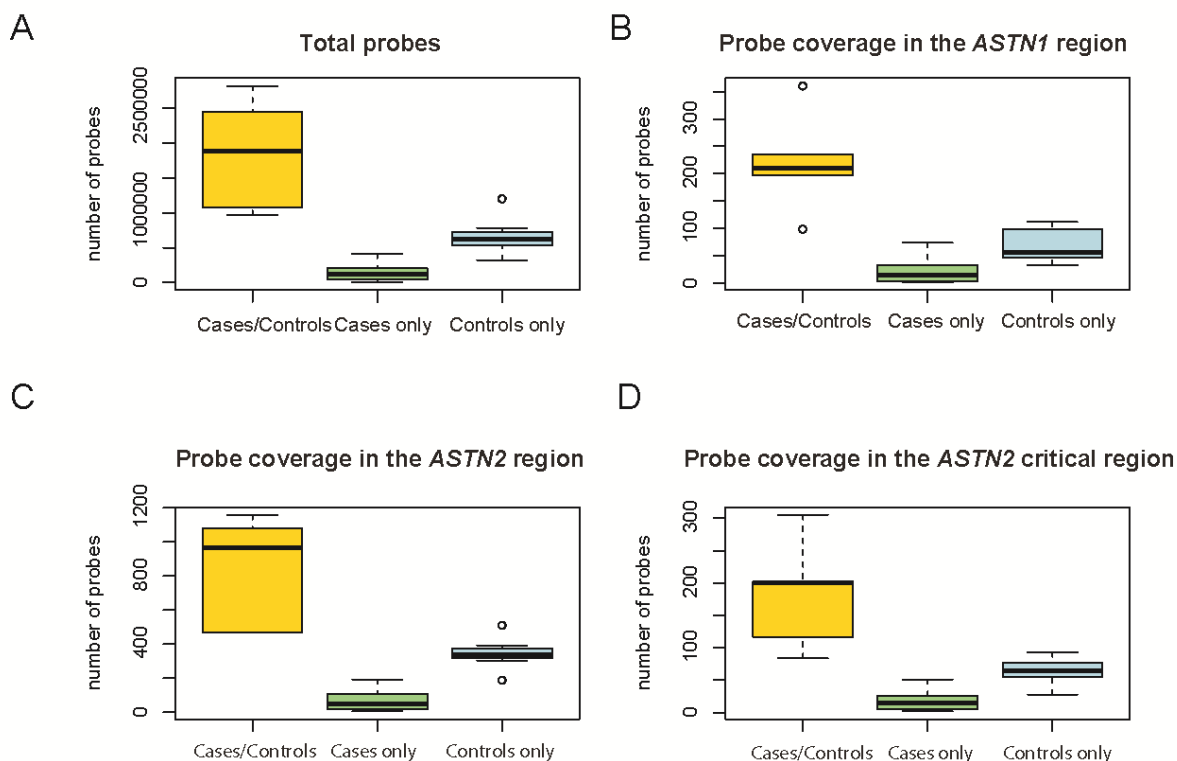

**Figure S9. Comparisons of probe distributions of the microarray platforms used in this study.** Box plots represent the distributions in microarray probe numbers across the genome (A) and within *ASTN1* (B), *ASTN2* (C) and the *ASTN2* critical region (D) (as highlighted by 3' end deletions affecting multiple isoforms) for the different platforms used in generating the CNV datasets utilized in this study (listed in Table S9). “Cases only” represent those microarray platforms utilized solely for CNV analysis of clinical samples (Cases in Table S9), “Controls only” represent microarray platforms from which CNV data was obtained for control individuals (Controls in Table S9) and “Cases/Controls” indicate microarray platforms from which CNV information was obtained for both case and control datasets (Cases, controls in Table S9). The plots reveal that the Control CNV dataset is generated from microarrays of resolutions significantly greater than or equal to those used to generate the Case CNV dataset.

**Table S2. Control cohorts examined for CNVs at *ASTN2/TRIM32* and *ASTN1***

| Control dataset                                              | # Samples (males/females) <sup>1</sup> | Microarray platform  | # exonic CNVs detected (at <i>ASTN2</i> / at <i>ASTN1</i> ) <sup>3</sup> | Description of control cohort     |
|--------------------------------------------------------------|----------------------------------------|----------------------|--------------------------------------------------------------------------|-----------------------------------|
| Ontario ARCTIC                                               | 1,120 (629/491)                        | Affymetrix 500K      | (0 / 0)                                                                  | Zogopoulos <i>et al.</i> (13)     |
| POPGEN                                                       | 1,123 (623/500)                        | Affymetrix 6.0       | (0 / 0)                                                                  | Krawczak <i>et al.</i> (14)       |
| Ottawa Heart Institute controls                              | 1,234 (586/648)                        | Affymetrix 6.0       | (0 / 0)                                                                  | Stewart <i>et al.</i> (15)        |
| HapMap (Phase 3)                                             | 1,056 (532/524)                        | Affymetrix 6.0       | (1 loss / 0)                                                             | Altshuler <i>et al.</i> (16)      |
| Starr County Diabetes study                                  | 1,794 (617/1,177)                      | Affymetrix 6.0       | (0 / 0)                                                                  | Below <i>et al.</i> (17)          |
| Geneva NHS/HPFS Diabetes study                               | 5,966 (2,608/3,358)                    | Affymetrix 6.0       | (3 losses, 1 gain / 1 loss)                                              | Qi <i>et al.</i> (18)             |
| International Schizophrenia Consortium controls <sup>2</sup> | 6,707 (N/A)                            | Affymetrix 6.0 & 5.0 | (1 loss, 1 gain / 0)                                                     | ISC (19) Ernst <i>et al.</i> (20) |
| Ontario Population Genomics Platform (OPGP)                  | 895 (489/406)                          | Affymetrix CytoHD    | (1 loss / 0)                                                             | Costain <i>et al.</i> (21)        |
| Population Diagnostics controls                              | 1,000 (502/498)                        | Agilent 1M           | (2 losses / 0)                                                           | Prasad <i>et al.</i> (22)         |
| EDIC Diabetes study                                          | 1,422 (748/674)                        | Illumina 1M          | (1 loss, 1 gain / 0)                                                     | Paterson <i>et al.</i> (23)       |
| Wellcome Trust (WTCCC) controls                              | 4,826 (2,412/2,414)                    | Illumina 1M          | (4 losses / 0)                                                           | Rucker <i>et al.</i> (24)         |
| SAGE consortium controls                                     | 1,287 (383/904)                        | Illumina 1M          | (1 gain / 0)                                                             | Bierut <i>et al.</i> (25)         |
| Health, Aging, and Body Composition (Health ABC) Study       | 2,566 (1,233/1,333)                    | Illumina 1M-Duo      | (0 / 0)                                                                  | Coviello <i>et al.</i> (26)       |
| KORA                                                         | 1,775 (855/920)                        | Illumina Omni 2.5M   | (2 losses / 0) <sup>4</sup>                                              | Verhoeven <i>et al.</i> (27)      |
| COGENE                                                       | 1,213 (498/715)                        | Illumina Omni 2.5M   | (0 / 0)                                                                  | Bierut <i>et al.</i> (28)         |
| Shaikh <i>et al.</i>                                         | 2,026 (922/1,104)                      | Illumina 550K        | (1 loss, 1 gain / 0)                                                     | Shaikh <i>et al.</i> (29)         |
| Cooper <i>et al.</i> (HGDP)                                  | 984 (641/343)                          | Illumina 650Y        | (0 / 0)                                                                  | Cooper <i>et al.</i> (30)         |
| Cooper <i>et al.</i> (London)                                | 760 (384/376)                          | Illumina 550K        | (0 / 0)                                                                  | Cooper <i>et al.</i> (30)         |
| Cooper <i>et al.</i> (FHCRC)                                 | 1,429 (0/1,429)                        | Illumina 610K Quad   | (0 / 0)                                                                  | Cooper <i>et al.</i> (30)         |
| Cooper <i>et al.</i> (NINDS)                                 | 668 (N/A)                              | Illumina 550K & 317K | (0 / 0)                                                                  | Cooper <i>et al.</i> (30)         |
| Cooper <i>et al.</i> (PARC – CAP & PRINCE)                   | 936 (N/A)                              | Illumina 317K        | (1 loss / 0)                                                             | Cooper <i>et al.</i> (30)         |
| Cooper <i>et al.</i> (PARC2 – CAP2 & PRINCE2)                | 766 (N/A)                              | Illumina 610K Quad   | (0 / 0)                                                                  | Cooper <i>et al.</i> (30)         |
| Cooper <i>et al.</i> (inChianti)                             | 695 (291/404)                          | Illumina 550K        | (1 loss/ 0)                                                              | Cooper <i>et al.</i> (30)         |
| Fernandez <i>et al.</i> controls                             | 1,131 (N/A)                            | Illumina 1M-Duo      | (0 / N/A)                                                                | Fernandez <i>et al.</i> (7)       |

|                            |               |               |                                      |                              |
|----------------------------|---------------|---------------|--------------------------------------|------------------------------|
| Vrijenhoek et al. controls | 706 (N/A)     | Illumina 550K | (0 / N/A)                            | Vrijenhoek <i>et al.</i> (1) |
| <b>Total</b>               | <b>44,085</b> |               | <b>(18 losses, 5 gains / 1 loss)</b> |                              |

<sup>1</sup>This column displays total number of individuals and the split by gender for each control dataset. Gender information was not available (N/A) for some of the control datasets.

<sup>2</sup>The 2,090 and 1,171 Wellcome Trust control samples that were a part of the Cooper *et al.* control cohorts and Ernst *et al.* ISC control cohorts respectively were excluded to avoid double-counting of control individuals in this study.

<sup>3</sup>The coordinates of the specific CNVs detected in the control individuals are provided in Table S3.

<sup>4</sup> One individual in the KORA control cohort (CF14 in Figure 1 and Table S3) had an exonic deletion that overlapped *TRIM32* without affecting any exons of *ASTN2*.

**Table S3: Coordinates of CNVs at *ASTN2/TRIM32* and *ASTN1* in control individuals**

| Sample | Control dataset        | Gender | CNV coordinates (hg18)       | CNV size  | CNV type | Gene(s)              |
|--------|------------------------|--------|------------------------------|-----------|----------|----------------------|
| CM1    | OPGP                   | male   | chr9:118,361,183-118,524,134 | 162,952   | loss     | <i>ASTN2, TRIM32</i> |
| CM2    | Cooper (Chianti)       | male   | chr9:118,497,798-118,530,393 | 32,596    | loss     | <i>ASTN2, TRIM32</i> |
| CM3    | NHGRI                  | male   | chr9:118,512,921-118,584,426 | 71,506    | loss     | <i>ASTN2</i>         |
| CM4    | NHGRI                  | male   | chr9:118,523,510-118,589,363 | 65,854    | loss     | <i>ASTN2</i>         |
| CM5    | Population Diagnostics | male   | chr9:118,532,361-118,539,807 | 7,447     | loss     | <i>ASTN2</i>         |
| CM6    | Population Diagnostics | male   | chr9:118,555,826-118,657,525 | 101,700   | loss     | <i>ASTN2</i>         |
| CM7    | NHGRI                  | male   | chr9:118,558,391-118,619,065 | 60,675    | loss     | <i>ASTN2</i>         |
| CM8    | WTCCC                  | male   | chr9:118,651,651-118,879,149 | 227,499   | loss     | <i>ASTN2</i>         |
| CM9    | WTCCC                  | male   | chr9:118,766,795-118,982,470 | 215,676   | loss     | <i>ASTN2</i>         |
| CM10   | Shaikh                 | male   | chr9:118,828,951-118,927,398 | 98,448    | loss     | <i>ASTN2</i>         |
| CF11   | KORA                   | female | chr9:118,378,404-118,449,364 | 70,961    | loss     | <i>ASTN2</i>         |
| CF12   | WTCCC                  | female | chr9:118,471,284-118,510,780 | 39,497    | loss     | <i>ASTN2, TRIM32</i> |
| CF13   | WTCCC                  | female | chr9:118,478,732-118,543,563 | 64,832    | loss     | <i>ASTN2 TRIM32</i>  |
| CF14   | KORA                   | female | chr9:118,501,096-118,507,817 | 6,722     | loss     | <i>TRIM32</i>        |
| CF15   | HapMap                 | female | chr9:118,514,521-118,531,233 | 16,713    | loss     | <i>ASTN2</i>         |
| CF16   | EDIC                   | female | chr9:118,543,563-118,621,959 | 78,397    | loss     | <i>ASTN2</i>         |
| CF17   | KORA                   | female | chr9:118,817,665-119,021,430 | 203,766   | loss     | <i>ASTN2</i>         |
| CU18   | ISC                    | N/A    | chr9:118,327,376-118,510,195 | 182,820   | loss     | <i>ASTN2 TRIM32</i>  |
| CU19   | Cooper (ParcPrince)    | N/A    | chr9:118,765,546-118,839,405 | 73,860    | loss     | <i>ASTN2</i>         |
| CM20   | SAGE                   | male   | chr9:118,619,065-118,859,862 | 240,798   | gain     | <i>ASTN2</i>         |
| CM21   | EDIC                   | male   | chr9:118,651,651-119,045,245 | 393,595   | gain     | <i>ASTN2</i>         |
| CM22   | Shaikh                 | male   | chr9:118,653,686-119,327,529 | 673,844   | gain     | <i>ASTN2</i>         |
| CF23   | NHGRI                  | female | chr9:118,479,893-118,508,356 | 28,464    | gain     | <i>ASTN2 TRIM32</i>  |
| CU24   | ISC                    | N/A    | chr9:118,792,975-121,058,965 | 2,265,991 | gain     | <i>ASTN2</i>         |
| CM25   | NHGRI                  | male   | chr1:174,960,861-175,139,720 | 178,860   | loss     | <i>ASTN1</i>         |



**Table S4: *ASTNI* missense sequence variants in 338 Canadian ASD cases<sup>1</sup>**

| Position (hg19)  | cDNA residue <sup>2</sup> | #AA <sup>3</sup> | #AB <sup>3</sup> | #BB <sup>3</sup> | Cases MAF <sup>4</sup> | dbSNP id        | dbSNP MAF <sup>4</sup> | NHLBI MAF (%) <sup>5</sup> | Inh. <sup>6</sup> | Exon | Amino acid change | Protein domain                                  | SIFT <sup>7</sup> | POLYPHEN <sup>7</sup> |
|------------------|---------------------------|------------------|------------------|------------------|------------------------|-----------------|------------------------|----------------------------|-------------------|------|-------------------|-------------------------------------------------|-------------------|-----------------------|
| chr1:176,999,962 | 1204(G>A)                 | 0                | 1                | 337              | 0.0015                 | N/A             | N/A                    | 0                          | Paternal          | 4    | R331Q             | N/A                                             | Damaging          | Probably Damaging     |
| chr1:176,913,063 | 2553(A>G)                 | 0                | 1                | 337              | 0.0015                 | N/A             | N/A                    | 0                          | Paternal          | 14   | I781V             | N/A                                             | Tolerated         | Benign                |
| chr1:176,863,877 | 2973(G>A)                 | 0                | 1                | 337              | 0.0015                 | rs<br>201071031 | 0.0005                 | 0                          | Paternal          | 17   | G921S             | Membrane attack complex/perforin (MACPF) domain | Tolerated         | Probably Damaging     |
| chr1:176,852,074 | 3495(A>C)                 | 0                | 1                | 337              | 0.0015                 | rs<br>151246825 | 0.0005                 | 0.3953                     | Paternal          | 20   | M1095L            | Fibronectin type-III domain                     | Tolerated         | Benign                |
| chr1:176,833,571 | 3946(G>A)                 | 0                | 1                | 337              | 0.0015                 | rs<br>148482637 | N/A                    | 0                          | Paternal          | 23   | R1245H            | N/A                                             | Damaging          | Probably Damaging     |
| chr1:176,833,481 | 4036(C>T)                 | 0                | 2                | 336              | 0.0030                 | rs<br>201817286 | 0.0005                 | 0                          | Both Maternal     | 23   | T1275M            | N/A                                             | Damaging          | Probably Damaging     |
| chr1:176,833,427 | 4090(A>G)                 | 0                | 1                | 337              | 0.0015                 | rs<br>61756323  | 0.0005                 | 0.4651                     | Maternal          | 23   | E1293G            | N/A                                             | Damaging          | Benign                |

<sup>1</sup> All exons of *ASTNI* (NM\_004319.1) were sequenced via exome sequencing (in 306 unrelated ASD probands of European ancestry) or whole genome sequencing (in 32 unrelated ASD probands of European ancestry) and all rare (<1% in 1000 genomes) missense changes were recorded. Exome and WGS calls were confirmed using Sanger sequencing in the proband.

<sup>2</sup> The nucleotide change from the reference sequence and the cDNA position of this change are recorded in this column.

<sup>3</sup> These three columns denote the number of ASD cases with each genotype: homozygous for the reference allele (AA), heterozygous (AB) and homozygous for the minor allele (BB).

<sup>4</sup> The minor allele frequency (MAF) was calculated for our ASD case cohort and recorded as stated in the NCBI dbSNP database (build 137).

<sup>5</sup> The minor allele frequency (MAF) of these variants was determined from 4,300 individuals of European ancestry who were exome sequenced as part of the NIH National Heart, Lung and Blood Institute (NHLBI) Exome Sequencing Project (<http://evs.gs.washington.edu/EVS/>).

<sup>6</sup> Inheritance was determined via Sanger sequencing of both parents for all variants previously confirmed in probands.

<sup>7</sup> The effects of the resulting amino acid changes on protein function were predicted using SIFT Human Protein (<http://sift.jcvi.org/>) and Polyphen-2 (<http://genetics.bwh.harvard.edu/pph2/>).

**Table S5: *ASTN2* missense sequence variants in 182 Canadian ASD cases<sup>1</sup>**

| Position (hg19)  | cDNA residue <sup>2</sup> | #AA <sup>3</sup> | #AB <sup>3</sup> | #BB <sup>3</sup> | Cases MAF <sup>4</sup> | dbSNP id        | dbSNP MAF <sup>4</sup> | NHLBI MAF (%) <sup>5</sup> | Inh. <sup>6</sup> | Exon | Amino acid change | Protein domain | SIFT <sup>7</sup> | POLYPHEN <sup>7</sup> |
|------------------|---------------------------|------------------|------------------|------------------|------------------------|-----------------|------------------------|----------------------------|-------------------|------|-------------------|----------------|-------------------|-----------------------|
| chr9:119,976,883 | 870(T>A)                  | 0                | 1                | 181              | 0.0027                 | rs<br>139148246 | 0.0009                 | 0.3953                     | Paternal          | 3    | S257T             | N/A            | Damaging          | Probably Damaging     |
| chr9:119,858,397 | 1150(C>T)                 | 0                | 1                | 181              | 0.0027                 | N/A             | N/A                    | 0                          | Paternal          | 4    | S350L             | N/A            | Damaging          | Probably Damaging     |
| chr9:119,770,434 | 1476(G>T)                 | 0                | 1                | 181              | 0.0027                 | rs<br>200108087 | N/A                    | 0                          | Maternal          | 6    | V459L             | N/A            | Tolerated         | Possibly Damaging     |
| chr9:119,738,454 | 1638(A>T)                 | 0                | 1                | 181              | 0.0027                 | rs<br>200986783 | N/A                    | 0                          | Maternal          | 8    | T513S             | N/A            | Damaging          | Benign                |
| chr9:119,204,756 | 3522(C>A)                 | 0                | 1                | 181              | 0.0027                 | rs<br>151278272 | N/A                    | 0.0698                     | Maternal          | 22   | L1141M            | N/A            | Tolerated         | Benign                |

<sup>1</sup> All exons of *ASTN2* (NM\_014010.4) were sequenced via exome sequencing (in 159 unrelated ASD probands of European ancestry) or whole genome sequencing (in 23 unrelated ASD probands of European ancestry) and all rare (<1% in 1000 genomes) missense changes were recorded. Exome and WGS calls were confirmed using Sanger sequencing in the proband.

<sup>2</sup> The nucleotide change from the reference sequence and the cDNA position of this change are recorded in this column.

<sup>3</sup> These three columns denote the number of ASD cases with each genotype: homozygous for the reference allele (AA), heterozygous (AB) and homozygous for the minor allele (BB).

<sup>4</sup> The minor allele frequency (MAF) was calculated for our ASD case cohort and recorded as stated in the NCBI dbSNP database (build 137).

<sup>5</sup> The minor allele frequency (MAF) of these variants was determined from 4,300 individuals of European ancestry who were exome sequenced as part of the NIH National Heart, Lung and Blood Institute (NHLBI) Exome Sequencing Project (<http://evs.gs.washington.edu/EVS/>).

<sup>6</sup> Inheritance was determined via Sanger sequencing of both parents for all variants previously confirmed in probands.

<sup>7</sup> The effects of the resulting amino acid changes on protein function were predicted using SIFT Human Protein (<http://sift.jcvi.org/>) and Polyphen-2 (<http://genetics.bwh.harvard.edu/pph2/>).

**Table S6: *TRIM32* missense sequence variants in 182 Canadian ASD cases<sup>1</sup>**

| Position (hg19)  | cDNA residue <sup>2</sup> | #AA <sup>3</sup> | #AB <sup>3</sup> | #BB <sup>3</sup> | Cases MAF <sup>4</sup> | dbSNP id    | dbSNP MAF <sup>4</sup> | NHLBI MAF <sup>5</sup> | Inh. <sup>6</sup> | Exon | Amino acid change | Protein domain | SIFT <sup>7</sup> | POLYPHEN <sup>7</sup> |
|------------------|---------------------------|------------------|------------------|------------------|------------------------|-------------|------------------------|------------------------|-------------------|------|-------------------|----------------|-------------------|-----------------------|
| chr9:119,460,622 | 762(C>T)                  | 0                | 1                | 181              | 0.0027                 | rs147304059 | 0.0005                 | 0                      | Paternal          | 2a   | R201C             | N/A            | Damaging          | Probably Damaging     |

<sup>1</sup> All exons of *TRIM32* (NM\_012210.3) were sequenced via exome sequencing (in 159 unrelated ASD probands of European ancestry) or whole genome sequencing (in 23 unrelated ASD probands of European ancestry) and all rare (<1% in 1000 genomes) missense changes were recorded. Exome and WGS calls were confirmed using Sanger sequencing in the proband.

<sup>2</sup> The nucleotide change from the reference sequence and the cDNA position of this change are recorded in this column.

<sup>3</sup> These three columns denote the number of ASD cases with each genotype: homozygous for the reference allele (AA), heterozygous (AB) and homozygous for the minor allele (BB).

<sup>4</sup> The minor allele frequency (MAF) was calculated for our ASD case cohort and recorded as stated in the NCBI dbSNP database (build 137).

<sup>5</sup> The minor allele frequency (MAF) of these variants was determined from 4,300 individuals of European ancestry who were exome sequenced as part of the NIH National Heart, Lung and Blood Institute (NHLBI) Exome Sequencing Project (<http://evs.gs.washington.edu/EVS/>).

<sup>6</sup> Inheritance was determined via Sanger sequencing of both parents for all variants previously confirmed in probands.

<sup>7</sup> The effects of the resulting amino acid changes on protein function were predicted using SIFT Human Protein (<http://sift.jcvi.org/>) and Polyphen-2 (<http://genetics.bwh.harvard.edu/pph2/>).

**Table S8. Cases from the DECIPHER database with exonic *ASTN2* CNVs**

| Decipher ID <sup>1</sup> | Sex | Location (hg18)              | Size      | CNV  | Genes <sup>2</sup>                                                                                                             | Phenotypes <sup>3</sup>                                                                                                                                       | Inheritance    |
|--------------------------|-----|------------------------------|-----------|------|--------------------------------------------------------------------------------------------------------------------------------|---------------------------------------------------------------------------------------------------------------------------------------------------------------|----------------|
| 278838                   | F   | chr9:116,513,630-120,227,136 | 3,713,507 | loss | <i>ASTN2</i> , <i>TRIM32</i> ,<br><i>PAPP</i> A, <i>TLR4</i> ,<br><i>TNFSF15</i> , <i>TNFSF8</i> ,<br><i>TNC</i> , <i>DECI</i> | Intrauterine growth retardation, <b>Delayed speech and language development</b> , <b>Microcephaly</b> , Abnormality of the mouth,<br>Abnormality of the heart | Paternal       |
| 257734                   | F   | chr9:118,069,619-118,390,411 | 320,793   | gain | <i>ASTN2</i> , <i>PAPP</i> A                                                                                                   | Abnormality of the female genitalia                                                                                                                           | Inherited      |
| 259298                   | F   | chr9:118,202,806-118,497,819 | 295,014   | loss | <i>ASTN2</i> , <i>TRIM32</i> ,<br><i>PAPP</i> A                                                                                | Unknown                                                                                                                                                       | Inherited      |
| 268467                   | M   | chr9:118,358,836-118,728,269 | 369,434   | loss | <i>ASTN2</i> , <i>TRIM32</i>                                                                                                   | <b>Intellectual disability</b>                                                                                                                                | Inherited      |
| 255906                   | M   | chr9:118,420,432-118,497,819 | 77,388    | loss | <i>ASTN2</i> , <i>TRIM32</i>                                                                                                   | Unknown                                                                                                                                                       | Inherited      |
| 251779                   | M   | chr9:118,440,935-118,584,415 | 143,481   | loss | <i>ASTN2</i> , <i>TRIM32</i>                                                                                                   | <b>Macrocephaly</b> , Strabismus, Epicanthus, Hyperextensible skin,<br><b>Intellectual disability</b> , Small nail                                            | Unknown        |
| 277198                   | F   | chr9:118,450,834-118,640,978 | 190,145   | loss | <i>ASTN2</i> , <i>TRIM32</i>                                                                                                   | Unknown                                                                                                                                                       | Unknown        |
| 264662                   | F   | chr9:118,458,944-118,875,161 | 416,218   | gain | <i>ASTN2</i> , <i>TRIM32</i>                                                                                                   | Strabismus, <b>Intellectual disability</b>                                                                                                                    | Inherited      |
| 275492                   | M   | chr9:118,459,293-118,558,331 | 99,039    | loss | <i>ASTN2</i> , <i>TRIM32</i>                                                                                                   | <b>Global developmental delay</b> , Postnatal <b>microcephaly</b> , Failure to thrive, High forehead, Fine hair, Prominent ears                               | Inherited      |
| 261647                   | M   | chr9:118,474,920-118,643,716 | 168,797   | loss | <i>ASTN2</i> , <i>TRIM32</i>                                                                                                   | Abnormality of the face, <b>Intellectual disability</b>                                                                                                       | Inherited      |
| 262543                   | M   | chr9:118,479,880-118,514,893 | 35,014    | loss | <i>ASTN2</i> , <i>TRIM32</i>                                                                                                   | <b>Cognitive impairment</b>                                                                                                                                   | Inherited      |
| 254230                   | M   | chr9:118,572,595-118,667,250 | 94,656    | loss | <i>ASTN2</i>                                                                                                                   | Unknown                                                                                                                                                       | Unknown        |
| 256747                   | F   | chr9:118,608,198-118,669,889 | 61,692    | loss | <i>ASTN2</i>                                                                                                                   | <b>Hyperactivity</b> , Dysarthria, <b>Intellectual disability</b> , Constipation                                                                              | Inherited      |
| 271050                   | M   | chr9:118,627,555-118,727,883 | 100,329   | loss | <i>ASTN2</i>                                                                                                                   | <b>Delayed speech &amp; language development</b> , <b>Intellectual disability</b>                                                                             | Inherited      |
| 271612                   | F   | chr9:118,728,270-118,934,998 | 206,729   | gain | <i>ASTN2</i>                                                                                                                   | <b>Mild Intellectual disability</b> , Obesity                                                                                                                 | Unknown        |
| 258065                   | M   | chr9:118,775,810-118,858,800 | 82,991    | gain | <i>ASTN2</i>                                                                                                                   | Low-set ears, Leukodystrophy                                                                                                                                  | <i>De novo</i> |
| 255473                   | M   | chr9:118,934,968-119,903,304 | 968,337   | gain | <i>ASTN2</i> , <i>TLR4</i>                                                                                                     | <b>Macrocephaly</b> , Hypertension, <b>Intellectual disability</b> , Obesity,<br>Cerebellar vermis hypoplasia, Pericarditis, Sleep disturbance                | Inherited      |

<sup>1</sup> The DECIPHER database (<https://decipher.sanger.ac.uk>) was inspected (access date: November 15, 2013) for individuals with CNVs smaller than 6 Mb that were exonic to *ASTN2*. As indicated in this table, there are 17 such individuals and 11 of the 13 (85%) with information available about the reasons for referral for clinical microarray testing reported one or more neurodevelopmental disorder (NDD) traits. The majority of the *ASTN2* CNVs reported in DECIPHER (11/17) overlapped the 3' end of the gene and affected the shorter isoforms of the gene and/or *TRIM32*. We were able to obtain additional information about case 251779 (patient 18 in this study).

<sup>2</sup> Genes overlapped by the CNV. Bolded *ASTN2* indicates that multiple isoforms of the gene are overlapped by the CNV.

<sup>3</sup> Clinical information obtained from the DECIPHER database. Bolded terms represent neurodevelopmental disorder (NDD) traits.

<sup>4</sup> Information about inheritance of the CNV from the DECIPHER database. "Inherited" indicates inherited CNV (information about sex of transmitting parent was not available).

**Table S9. Microarray probe coverage at *ASTN2/TRIM32* and *ASTN1***

| Microarray platform     | Datasets        | Sites <sup>1</sup> | Total # array probes | # probes at <i>ASTN1</i> <sup>2</sup> | # probes at <i>ASTN2</i> <sup>3</sup> | # probes in critical region <sup>4</sup> |
|-------------------------|-----------------|--------------------|----------------------|---------------------------------------|---------------------------------------|------------------------------------------|
| Affymetrix 250K         | Cases           | ITA                | 262,264              | 39                                    | 137                                   | 24                                       |
| Agilent 44K             | Cases           | ITA                | 42,494               | 2                                     | 8                                     | 4                                        |
| Agilent 4x44K ISCA      | Cases           | HSC,ITA,MC         | 42,869               | 3                                     | 18                                    | 5                                        |
| Agilent 60K             | Cases           | ACH, BBG           | 62,976               | 2                                     | 6                                     | 2                                        |
| Agilent 180K            | Cases           | ITA                | 170,334              | 29                                    | 73                                    | 21                                       |
| Agilent 4x180K ISCA     | Cases           | CVH, ITA           | 174,200              | 16                                    | 62                                    | 18                                       |
| Agilent 4x180K ISCA v2  | Cases           | HSC, MC            | 180,880              | 14                                    | 39                                    | 11                                       |
| Agilent 244K            | Cases           | BCH                | 236,162              | 37                                    | 118                                   | 34                                       |
| Agilent 400K            | Cases           | OUH                | 411,056              | 74                                    | 193                                   | 51                                       |
| SignatureChipOS 105K    | Cases           | SG                 | 95,933               | 5                                     | 18                                    | 5                                        |
| SignatureChipOS v2 135K | Cases           | SG                 | 134,811              | 10                                    | 31                                    | 8                                        |
| SignatureChipOS v3 135K | Cases           | SG                 | 138,466              | 31                                    | 99                                    | 28                                       |
| Affymetrix SNP 6.0      | Cases, controls | TCAG               | 1,880,794            | 235                                   | 969                                   | 202                                      |
| Agilent 1M              | Cases, controls | TCAG               | 967,029              | 197                                   | 470                                   | 117                                      |
| Illumina 1M             | Cases, controls | TCAG               | 1,072,820            | 99                                    | 468                                   | 84                                       |
| Illumina Omni 2.5M      | Cases, controls | TCAG               | 2,443,177            | 210                                   | 1,079                                 | 201                                      |
| Affymetrix CytoScan HD  | Cases, controls | TCAG               | 2,819,494            | 360                                   | 1,159                                 | 305                                      |
| Affymetrix 500K         | Controls        | -                  | 501,138              | 90                                    | 305                                   | 66                                       |
| Affymetrix SNP 5.0      | Controls        | -                  | 781,522              | 112                                   | 361                                   | 88                                       |
| Illumina 317K           | Controls        | -                  | 318,237              | 34                                    | 188                                   | 28                                       |
| Illumina 550K           | Controls        | -                  | 561,303              | 47                                    | 337                                   | 56                                       |
| Illumina 610K Quad      | Controls        | -                  | 620,901              | 47                                    | 330                                   | 55                                       |
| Illumina 650Y           | Controls        | -                  | 660,755              | 56                                    | 393                                   | 64                                       |
| Illumina 1M-Duo         | Controls        | -                  | 1,199,187            | 107                                   | 511                                   | 93                                       |

<sup>1</sup> Molecular diagnostic testing site of origin of cases. ACH, Alberta Children's Hospital; BBG, Brain and Body Genetic Resource Exchange (BBGRE); BCH, Boston Children's Hospital; CVH, Credit Valley Hospital; HSC, The Hospital for Sick Children; ITA, Italian diagnostic labs; MC, Mayo Clinic; OUH, Odense University Hospital; SG, Signature Genomics; TCAG, The Centre for Applied Genomics.

<sup>2</sup> Number of array probes within *ASTN1* (hg18 coordinates of chr1:175,096,826-175,400,647).

<sup>3</sup> Number of array probes within *ASTN2* (hg18 coordinates of chr9:118,227,325-119,217,138).

<sup>4</sup> Number of array probes within the critical region encompassing *TRIM32* and multiple isoforms of *ASTN2* (hg18 coordinates of chr9:118,227,325-118,503,400).

**Table S10. RT-PCR and qRT-PCR primer sets used for *ASTN2* expression analysis**

| <b>Primer name</b>                             | <b>Forward primer</b>  | <b>Reverse primer</b> | <b>Accession number for transcript detected</b>                                 |
|------------------------------------------------|------------------------|-----------------------|---------------------------------------------------------------------------------|
| <i>ASTN2</i><br><b>All isoforms pair1*</b>     | AGGGAGGCACTCAGAGCTAA   | CCATCTGCTGCTCCTTTCCA  | NM_014010, NM_198186,<br>NM_198188, NM_198187,<br>NM_001184734,<br>NM_001184735 |
| <i>ASTN2</i><br><b>All isoforms pair2*</b>     | ATCGATGACTGGTGCAGGTG   | TACTGGAGGGCTCCACTGTT  | NM_014010, NM_198186,<br>NM_198188, NM_198187,<br>NM_001184735                  |
| <i>ASTN2</i><br><b>Long isoform pair3*</b>     | CAGGTGGATTCCCTCGGGATG  | GCCGCCATTAAGCCATCAG   | NM_014010                                                                       |
| <i>ASTN2</i><br><b>Long isoform pair4*</b>     | CTTTGTGCGTAACGAGCTGC   | CTGTGCCAGACATCTCCAGG  | NM_014010                                                                       |
| <i>ASTN2</i><br><b>Shorter isoforms</b>        | ATGAAGAAACCGACGCCCAT   | ATCTGACAGCATCTGGGCTG  | NM_198187, NM_198188,<br>NM_001184734,<br>NM_001184735                          |
| <i>ASTN2</i><br><b>Shorter isoforms pair5*</b> | GCTCAAGTTCCTCAAGACCACA | ATCTGACAGCATCTGGGCTG  | NM_198187, NM_198188,<br>NM_001184734,<br>NM_001184735                          |
| <i>ASTN2</i><br><b>NM_198186</b>               | AGGCAGACTTGGGGAGTACA   | ATCTGACAGCATCTGGGCTG  | NM_198186                                                                       |
| <i>ASTN2</i><br><b>NM_001184734 pair6</b>      | ATCGATGACTGGTGCAGGTG   | CAAGGCTGGTTCAATATCCGC | NM_001184734                                                                    |

\*qRT-PCR primers

## Supplementary References

- 1 Vrijenhoek, T., Buizer-Voskamp, J.E., van der Stelt, I., Strengman, E., Sabatti, C., Geurts van Kessel, A., Brunner, H.G., Ophoff, R.A. and Veltman, J.A. (2008) Recurrent CNVs disrupt three candidate genes in schizophrenia patients. *Am. J. Hum. Genet.*, **83**, 504-510.
- 2 Lionel, A.C., Crosbie, J., Barbosa, N., Goodale, T., Thiruvahindrapuram, B., Rickaby, J., Gazzellone, M., Carson, A.R., Howe, J.L., Wang, Z. *et al.* (2011) Rare copy number variation discovery and cross-disorder comparisons identify risk genes for ADHD. *Sci Transl Med*, **3**, 95ra75.
- 3 Bernardini, L., Alesi, V., Loddo, S., Novelli, A., Bottillo, I., Battaglia, A., Digilio, M.C., Zampino, G., Ertel, A., Fortina, P. *et al.* (2010) High-resolution SNP arrays in mental retardation diagnostics: how much do we gain? *Eur. J. Hum. Genet.*, **18**, 178-185.
- 4 Glessner, J.T., Wang, K., Cai, G., Korvatska, O., Kim, C.E., Wood, S., Zhang, H., Estes, A., Brune, C.W., Bradfield, J.P. *et al.* (2009) Autism genome-wide copy number variation reveals ubiquitin and neuronal genes. *Nature*, **459**, 569-573.
- 5 Grozeva, D., Kirov, G., Ivanov, D., Jones, I.R., Jones, L., Green, E.K., St Clair, D.M., Young, A.H., Ferrier, N., Farmer, A.E. *et al.* (2010) Rare copy number variants: a point of rarity in genetic risk for bipolar disorder and schizophrenia. *Arch Gen Psychiatry*, **67**, 318-327.
- 6 Vulto-van Silfhout, A.T., Hehir-Kwa, J.Y., van Bon, B.W., Schuurs-Hoeijmakers, J.H., Meader, S., Hellebrekers, C.J., Thoonen, I.J., de Brouwer, A.P., Brunner, H.G., Webber, C. *et al.* (2013) Clinical significance of de novo and inherited copy-number variation. *Hum. Mutat.*, **34**, 1679-1687.
- 7 Fernandez, T.V., Sanders, S.J., Yurkiewicz, I.R., Ercan-Sencicek, A.G., Kim, Y.S., Fishman, D.O., Raubeson, M.J., Song, Y., Yasuno, K., Ho, W.S. *et al.* (2012) Rare copy number variants in tourette syndrome disrupt genes in histaminergic pathways and overlap with autism. *Biol Psychiatry*, **71**, 392-402.
- 8 Seno, M.M., Hu, P., Gwadry, F.G., Pinto, D., Marshall, C.R., Casallo, G. and Scherer, S.W. (2011) Gene and miRNA expression profiles in autism spectrum disorders. *Brain Res.*, **1380**, 85-97.
- 9 Valdar, W.S. (2002) Scoring residue conservation. *Proteins*, **48**, 227-241.
- 10 Kang, H.J., Kawasawa, Y.I., Cheng, F., Zhu, Y., Xu, X., Li, M., Sousa, A.M., Pletikos, M., Meyer, K.A., Sedmak, G. *et al.* (2011) Spatio-temporal transcriptome of the human brain. *Nature*, **478**, 483-489.
- 11 Pinto, D., Pagnamenta, A.T., Klei, L., Anney, R., Merico, D., Regan, R., Conroy, J., Magalhaes, T.R., Correia, C., Abrahams, B.S. *et al.* (2010) Functional impact of global rare copy number variation in autism spectrum disorders. *Nature*, **466**, 368-372.
- 12 Merico, D., Isserlin, R., Stueker, O., Emili, A. and Bader, G.D. (2010) Enrichment map: a network-based method for gene-set enrichment visualization and interpretation. *PLoS One*, **5**, e13984.
- 13 Zogopoulos, G., Ha, K.C., Naqib, F., Moore, S., Kim, H., Montpetit, A., Robidoux, F., Laflamme, P., Cotterchio, M., Greenwood, C. *et al.* (2007) Germ-line DNA copy number variation frequencies in a large North American population. *Hum. Genet.*, **122**, 345-353.
- 14 Krawczak, M., Nikolaus, S., von Eberstein, H., Croucher, P.J., El Mokhtari, N.E. and Schreiber, S. (2006) PopGen: population-based recruitment of patients and controls for the analysis of complex genotype-phenotype relationships. *Community Genet*, **9**, 55-61.
- 15 Stewart, A.F., Dandona, S., Chen, L., Assogba, O., Belanger, M., Ewart, G., LaRose, R., Doelle, H., Williams, K., Wells, G.A. *et al.* (2009) Kinesin family member 6 variant Trp719Arg does not associate with angiographically defined coronary artery disease in the Ottawa Heart Genomics Study. *J. Am. Coll. Cardiol.*, **53**, 1471-1472.

- 16 Altshuler, D.M., Gibbs, R.A., Peltonen, L., Dermitzakis, E., Schaffner, S.F., Yu, F., Bonnen, P.E., de Bakker, P.I., Deloukas, P., Gabriel, S.B. *et al.* (2010) Integrating common and rare genetic variation in diverse human populations. *Nature*, **467**, 52-58.
- 17 Below, J.E., Gamazon, E.R., Morrison, J.V., Konkashbaev, A., Pluzhnikov, A., McKeigue, P.M., Parra, E.J., Elbein, S.C., Hallman, D.M., Nicolae, D.L. *et al.* (2011) Genome-wide association and meta-analysis in populations from Starr County, Texas, and Mexico City identify type 2 diabetes susceptibility loci and enrichment for expression quantitative trait loci in top signals. *Diabetologia*, **54**, 2047-2055.
- 18 Qi, L., Cornelis, M.C., Kraft, P., Stanya, K.J., Linda Kao, W.H., Pankow, J.S., Dupuis, J., Florez, J.C., Fox, C.S., Pare, G. *et al.* (2010) Genetic variants at 2q24 are associated with susceptibility to type 2 diabetes. *Hum. Mol. Genet.*, **19**, 2706-2715.
- 19 InternationalSchizophreniaConsortium (2008) Rare chromosomal deletions and duplications increase risk of schizophrenia. *Nature*, **455**, 237-241.
- 20 Ernst, C., Marshall, C.R., Shen, Y., Metcalfe, K., Rosenfeld, J., Hodge, J.C., Torres, A., Blumenthal, I., Chiang, C., Pillalamarri, V. *et al.* (2012) Highly penetrant alterations of a critical region including BDNF in human psychopathology and obesity. *Arch Gen Psychiatry*, **69**, 1238-1246.
- 21 Costain, G., Lionel, A.C., Merico, D., Forsythe, P., Russell, K., Lowther, C., Yuen, T., Husted, J., Stavropoulos, D.J., Speevak, M. *et al.* (2013) Pathogenic rare copy number variants in community-based schizophrenia suggest a potential role for clinical microarrays. *Hum. Mol. Genet.*, **22**, 4485-4501.
- 22 Prasad, A., Merico, D., Thiruvahindrapuram, B., Wei, J., Lionel, A.C., Sato, D., Rickaby, J., Lu, C., Szatmari, P., Roberts, W. *et al.* (2012) A discovery resource of rare copy number variations in individuals with autism spectrum disorder. *G3 (Bethesda)*, **2**, 1665-1685.
- 23 Paterson, A.D., Waggott, D., Boright, A.P., Hosseini, S.M., Shen, E., Sylvestre, M.P., Wong, I., Bharaj, B., Cleary, P.A., Lachin, J.M. *et al.* (2010) A genome-wide association study identifies a novel major locus for glycemic control in type 1 diabetes, as measured by both A1C and glucose. *Diabetes*, **59**, 539-549.
- 24 Rucker, J.J., Breen, G., Pinto, D., Pedroso, I., Lewis, C.M., Cohen-Woods, S., Uher, R., Schosser, A., Rivera, M., Aitchison, K.J. *et al.* (2013) Genome-wide association analysis of copy number variation in recurrent depressive disorder. *Mol. Psychiatry*, **18**, 183-189.
- 25 Bierut, L.J., Agrawal, A., Bucholz, K.K., Doheny, K.F., Laurie, C., Pugh, E., Fisher, S., Fox, L., Howells, W., Bertelsen, S. *et al.* (2010) A genome-wide association study of alcohol dependence. *Proc. Natl. Acad. Sci. U.S.A.*, **107**, 5082-5087.
- 26 Coviello, A.D., Haring, R., Wellons, M., Vaidya, D., Lehtimaki, T., Keildson, S., Lunetta, K.L., He, C., Fornage, M., Lagou, V. *et al.* (2012) A genome-wide association meta-analysis of circulating sex hormone-binding globulin reveals multiple Loci implicated in sex steroid hormone regulation. *PLoS Genet.*, **8**, e1002805.
- 27 Verhoeven, V.J., Hysi, P.G., Wojciechowski, R., Fan, Q., Guggenheim, J.A., Hohn, R., MacGregor, S., Hewitt, A.W., Nag, A., Cheng, C.Y. *et al.* (2013) Genome-wide meta-analyses of multi-ancestry cohorts identify multiple new susceptibility loci for refractive error and myopia. *Nat. Genet.*, **45**, 314-318.
- 28 Bierut, L.J., Madden, P.A., Breslau, N., Johnson, E.O., Hatsukami, D., Pomerleau, O.F., Swan, G.E., Rutter, J., Bertelsen, S., Fox, L. *et al.* (2007) Novel genes identified in a high-density genome wide association study for nicotine dependence. *Hum. Mol. Genet.*, **16**, 24-35.
- 29 Shaikh, T.H., Gai, X., Perin, J.C., Glessner, J.T., Xie, H., Murphy, K., O'Hara, R., Casalunovo, T., Conlin, L.K., D'Arcy, M. *et al.* (2009) High-resolution mapping and analysis of copy number variations in the human genome: a data resource for clinical and research applications. *Genome Res.*, **19**, 1682-1690.
- 30 Cooper, G.M., Coe, B.P., Girirajan, S., Rosenfeld, J.A., Vu, T.H., Baker, C., Williams, C., Stalker, H., Hamid, R., Hannig, V. *et al.* (2011) A copy number variation morbidity map of developmental delay. *Nat. Genet.*, **43**, 838-846.
